# Supplementary material for: Endoplasmic Reticulum-Targeting Two-Photon Fluorescent Probe for CYP1A Activity and Its Imaging Application in Endoplasmic Reticulum Stress
Source: MDPI journal article supplement (doi:10.3390/molecules28083472), 2023-04-14
Supplement: s1 [file s1]

*Supplementary Material for*

Endoplasmic Reticulum-Targeting Two-Photon Fluorescent Probe for CYP1A  
Activity and Its Imaging Application in Endoplasmic Reticulum Stress

Chao Shi<sup>1,2,†</sup>, Yan Wang<sup>2,†</sup>, Xiangge Tian<sup>1</sup>, Xia Lv<sup>2</sup>, Yue An<sup>1</sup>, Jing Ning<sup>1,2,\*</sup>, Xiulan Xin<sup>3</sup>,  
Li Dai<sup>1,\*</sup>, Xiaochi Ma<sup>1</sup> and Lei Feng<sup>1,4,5\*</sup>

<sup>1</sup>Second Affiliated Hospital, Dalian Medical University, Dalian 116023, China

<sup>2</sup>College of Pharmacy, Dalian Medical University, Dalian 116044, China

<sup>3</sup>College of Bioengineering, Beijing Polytechnic, Beijing 100029, China

<sup>4</sup>School of Chemistry and Chemical Engineering, Henan Normal University, Xinxiang 453007, China

<sup>5</sup>Key Laboratory of Emergency and Trauma of Ministry of Education, Hainan Medical University, Haikou 571199, China

\*Correspondence: ningjing0626@163.com (J.N.); daily21st@aliyun.com (L.D.);  
leifeng@dmu.edu.cn (L.F.)

<sup>†</sup>These authors made equal contributions to this work.

## Table of Contents

|                               |   |
|-------------------------------|---|
| Supplementary Figure S1. .... | 1 |
| Supplementary Figure S2. .... | 1 |
| Supplementary Figure S3. .... | 2 |
| Supplementary Figure S4. .... | 2 |
| Supplementary Figure S5. .... | 3 |
| Supplementary Table S1. ....  | 3 |
| NMR and MS Spectra. ....      | 4 |

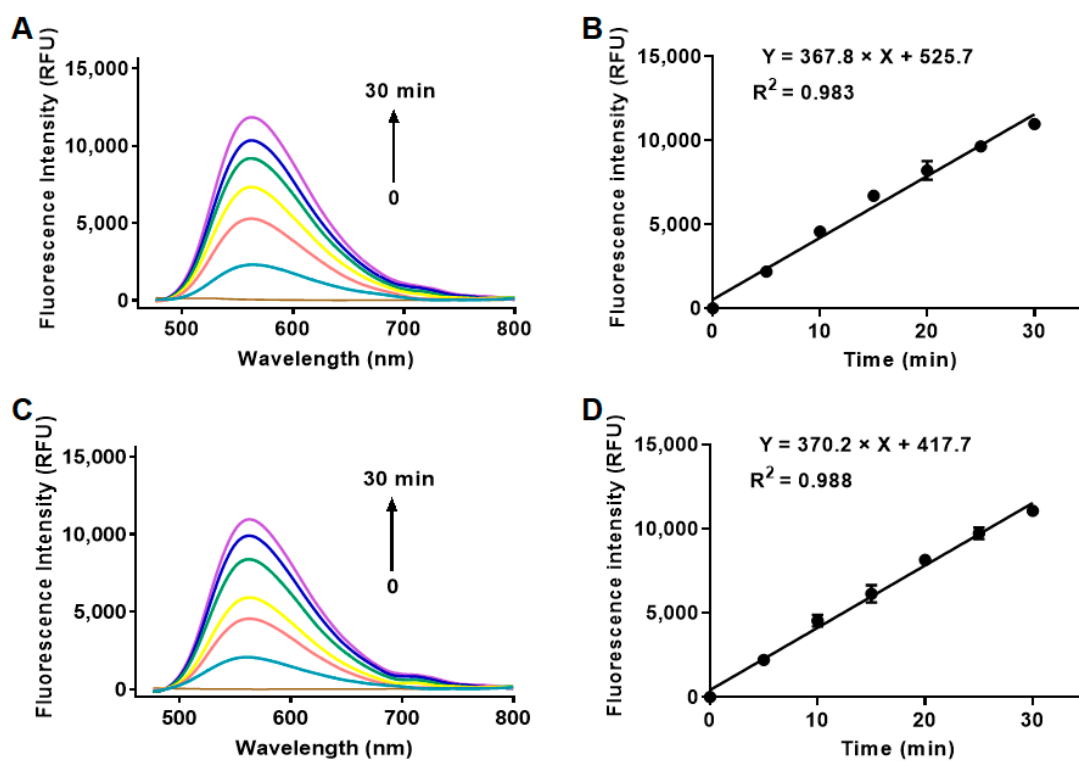

**Supplementary Figure S1.** Fluorescence spectra of **ERNM** that incubated with 7.5 nM CYP1A1 (A) and 7.5 nM CYP1A2 (C) with the prolonging of time, respectively. Fluorescence intensity of **ERNM** at 558 nm that incubated with CYP1A1 (B) and CYP1A2 (D) for different duration.  $\lambda_{\text{ex}} = 450$  nm. Data in Figure B and D are shown as the mean  $\pm$  S.D.

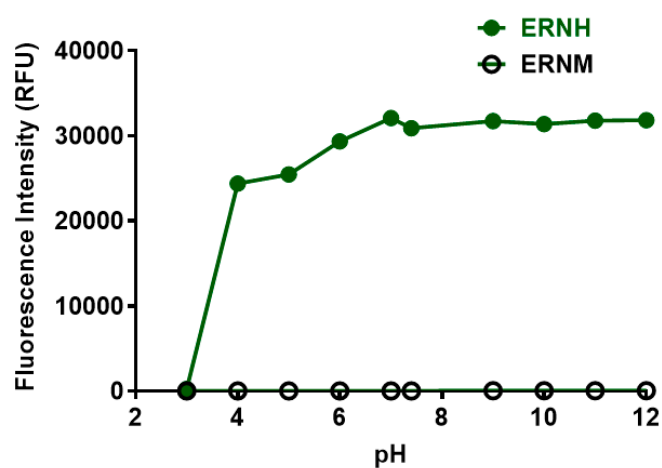

**Supplementary Figure S2.** The effects of pH values on the fluorescence intensity of **ERNM** and its metabolite **ERNH** (2.5  $\mu$ M).

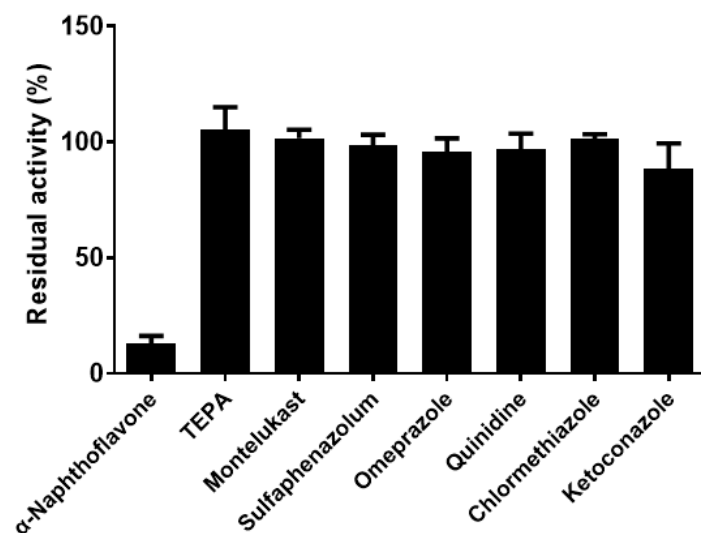

**Supplementary Figure S3.** Inhibitory effects of selective CYP inhibitors on **ERNM** *O*-demethylation in human liver microsomes. TEPA, N,N',N''-triethylene thiophosphoramide.

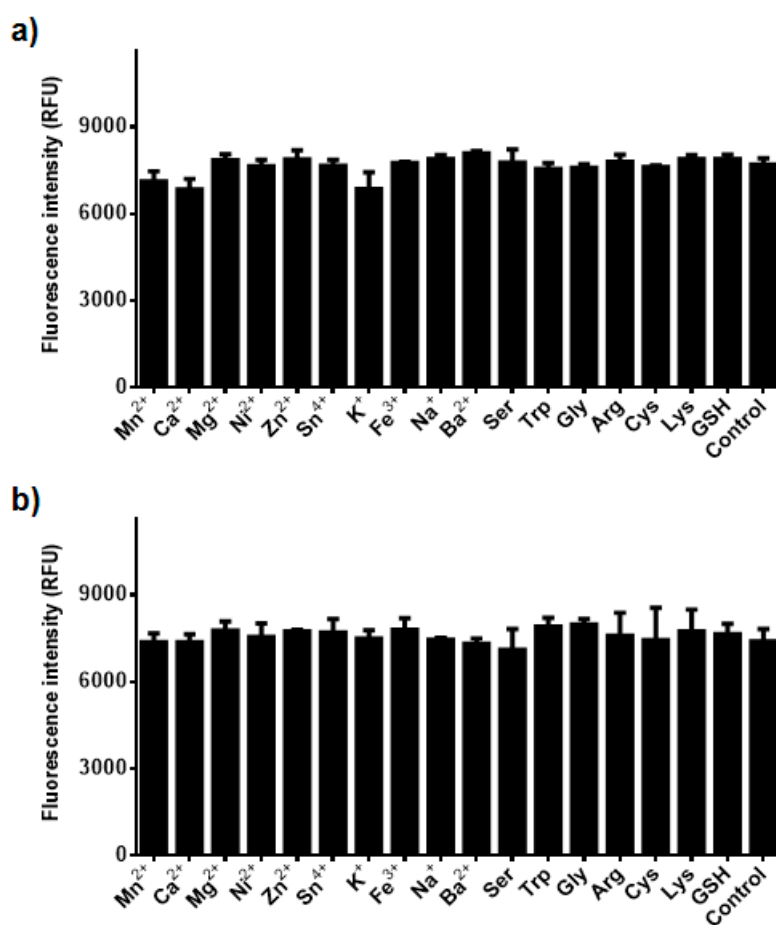

**Supplementary Figure S4.** Fluorescence responses of **ERNM** towards CYP1A1 (a) and CYP1A2 (b) in the presence of various analytes.

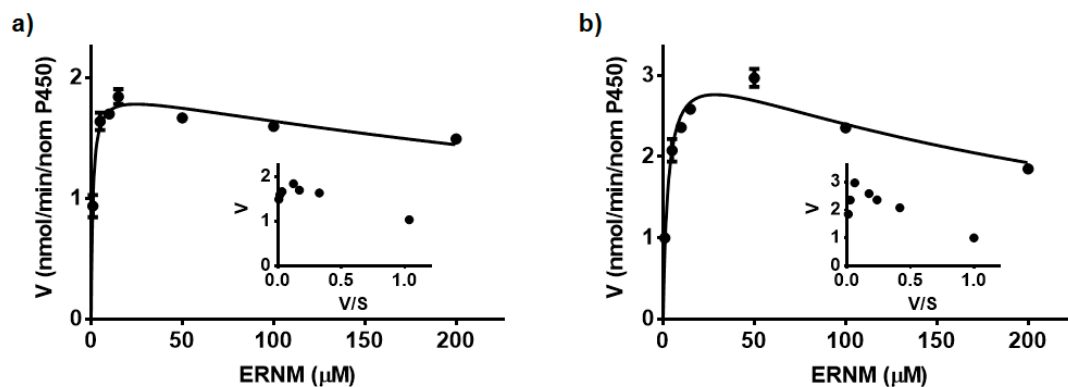

**Supplementary Figure S5.** Kinetic plots of **ERNM** *O*-demethylation in CYP1A1 (a) and CYP1A2 (b). The corresponding Eadie-Hofstee plot is shown as an inset.

**Table S1.** Kinetic parameters of **ERNM** *O*-demethylation determined in CYP1A1 and CYP1A2.

| Enzyme sources | $V_{\max}$<br>(nmol/min/nmol p450) | $K_m$<br>( $\mu\text{M}$ ) | $K_{si}$<br>( $\mu\text{M}$ ) |
|----------------|------------------------------------|----------------------------|-------------------------------|
| CYP1A1         | $1.92 \pm 0.04$                    | $1.0 \pm 0.1$              | $611.3 \pm 93.8$              |
| CYP1A2         | $3.32 \pm 0.15$                    | $2.9 \pm 0.5$              | $281.2 \pm 50.2$              |

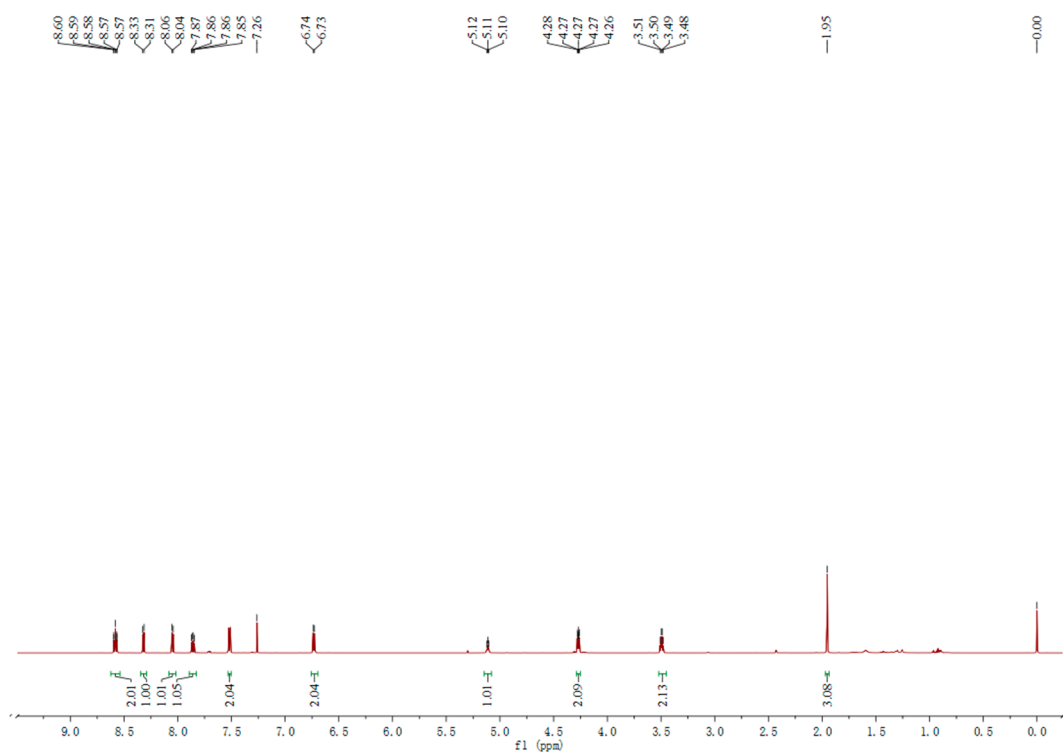

Supplementary Figure S6. <sup>1</sup>H NMR of ERNBr

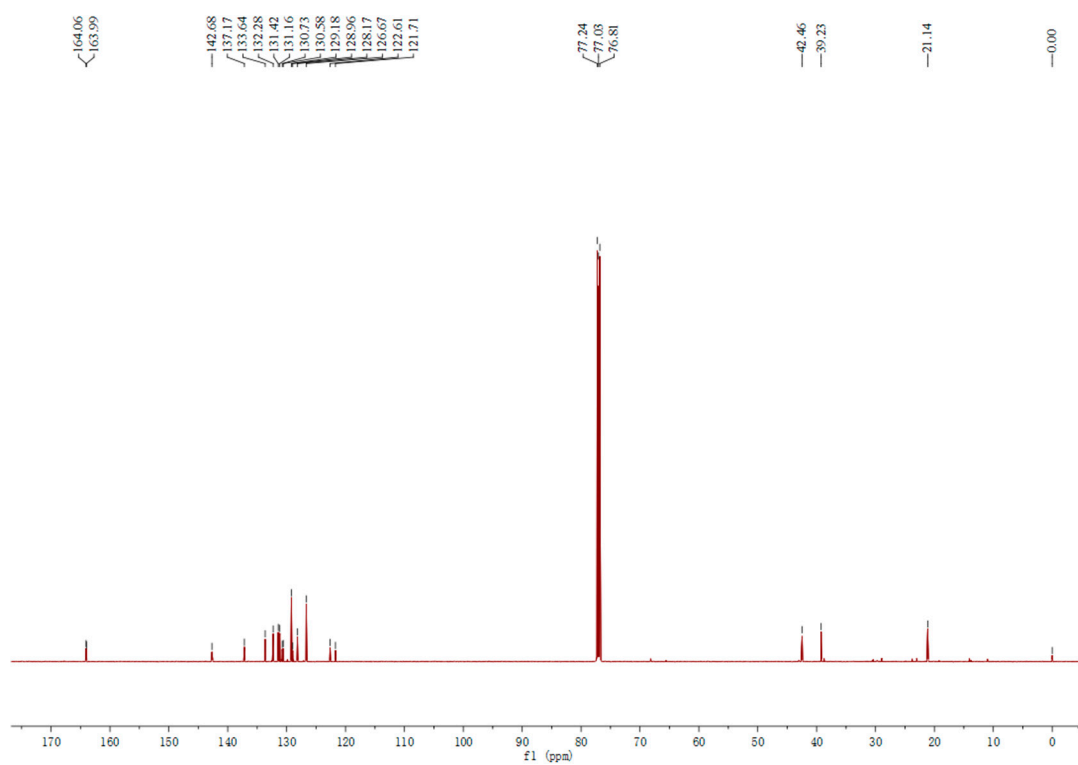

Supplementary Figure S7. <sup>13</sup>C NMR of ERNBr

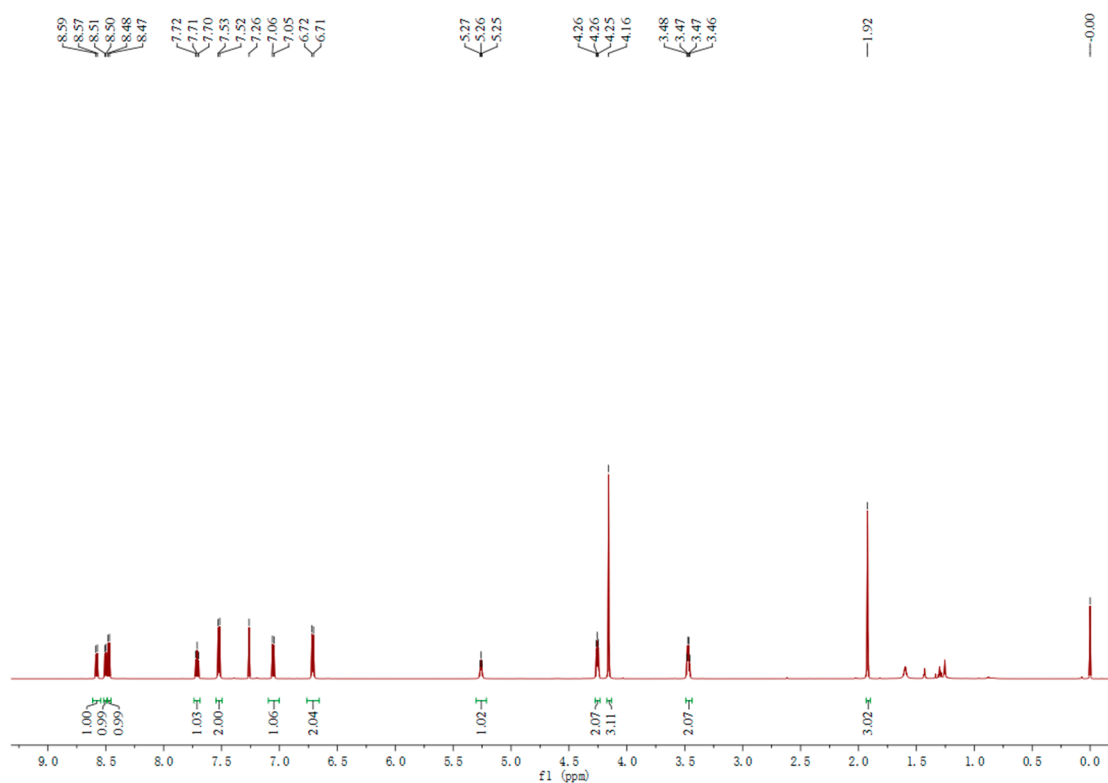

Supplementary Figure S8. <sup>1</sup>H NMR of ERNM

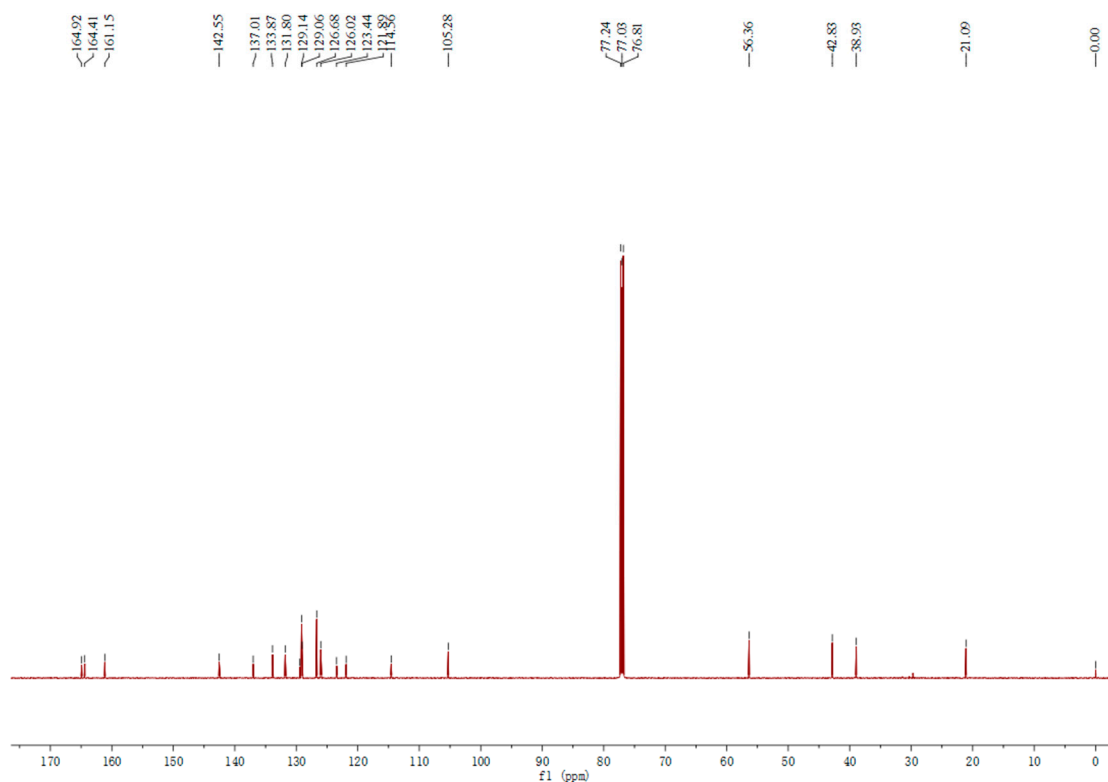

Supplementary Figure S9. <sup>13</sup>C NMR of ERNM

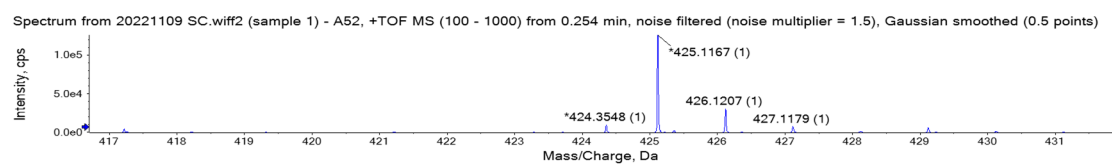

**Supplementary Figure S10. HRMS spectrum of ERNM**
